# Supplementary material for: Localization and density of tertiary lymphoid structures associate with molecular subtype and clinical outcome in colorectal cancer liver metastases
Source: HighWire-hosted journal article supplement (doi:10.1136/jitc-2022-006425), 2023-02-01
Supplement: jitc-2022-006425supp001_data_supplement.pdf [file jitc-2022-006425supp001_data_supplement.pdf]

## Localization and density of tertiary lymphoid structures associate with molecular subtype and clinical outcome in colorectal cancer liver metastases

Chong Zhang<sup>1,†</sup>, Xiang-Yu Wang<sup>2,†</sup>, Jie-Liang Zuo<sup>3,†</sup>, Xue-Fu Wang<sup>4,5,†</sup>, Xiao-Wen Feng<sup>4,5</sup>, Bo Zhang<sup>2</sup>, Yi-Tong Li<sup>2</sup>, Chen-He Yi<sup>2</sup>, Peng Zhang<sup>2</sup>, Xiao-Chen Ma<sup>2</sup>, Zhen-Mei Chen<sup>2</sup>, Yue Ma<sup>2</sup>, Jia-Hao Han<sup>2</sup>, Bao-Rui Tao<sup>2</sup>, Rui Zhang<sup>2</sup>, Tian-Qi Wang<sup>1</sup>, Li Tong<sup>1</sup>, Wang Gu<sup>1</sup>, Si-Yu Wang<sup>1</sup>, Xiao-Fei Zheng<sup>1</sup>, Wen-Kang Yuan<sup>1</sup>, Zi-Jie Kan<sup>1</sup>, Jie Fan<sup>6</sup>, Xiang-Yang Hu<sup>7</sup>, Jun Li<sup>3,\*</sup>, Chao Zhang<sup>1,\*</sup>, Jin-Hong Chen<sup>2,\*</sup>

<sup>1</sup>Department of General Surgery, The First Affiliated Hospital of Anhui Medical University, Hefei 230022, China

<sup>2</sup>Department of General Surgery, Huashan Hospital, Fudan University, Shanghai 200040, China

<sup>3</sup>Department of General Surgery, Shanghai 10th People's Hospital, Tongji University, Shanghai 200072, China

<sup>4</sup>School of Pharmacy, Anhui Medical University, Hefei 230032, China

<sup>5</sup>Inflammation and Immune Mediated Diseases Laboratory of Anhui Province, Anhui Medical University, Hefei 230032, China

<sup>6</sup>Department of Pathology, Huashan Hospital, Fudan University, Shanghai, 200040 China

<sup>7</sup>Department of Pathology, The First Affiliated Hospital of Anhui Medical University, Hefei 230022, China

<sup>†</sup>These authors contributed equally to this work.

### \*Correspondence:

Jin-Hong Chen, Department of General Surgery, Huashan Hospital, Fudan University, Shanghai 200040, China. Email: jinhongch@hotmail.com.

Chao Zhang, Department of General Surgery, The First Affiliated Hospital of Anhui Medical University, Hefei 230022, China. Email: 13965053990@163.com.

Jun Li, Department of General Surgery, Shanghai 10th People's Hospital, Tongji University, Shanghai 200072, China. Email: lijundfgd1@163.com.

**Table of contents**

Supplementary methods .....  
3

Supplementary figures ..... 4

Supplementary tables .....  
12

## **Supplementary methods**

### **Evaluation of TLS abundance in the IM region**

The subregions of WSI were shown in Supplementary Fig. 1A. TLS abundance in the IM region (IM score) was divided into three groups: (1) score 0: without TLS in the IM region; (2) score 1: the area of TLSs in the IM region is less than 50% and (3) score 2: the area of TLSs in the IM region is more than 50% (Supplementary Fig. 1B).

### **Verification of the TLS scoring system**

The subregions of TLSs in Cohort D were assessed by pathologists and the TLS fraction in the T region and P region (area of TLSs/area of the scoring subregion) was calculated by computer. As shown in Supplementary Fig. 1C and D, T score 0, 1, 2 and 3 corresponded to TLS fractions 0%, 0%-0.8%, 0.8%-1.6% and 1.6%-100%, respectively, while P score 0, 1, 2 and 3 corresponded to TLS fractions 0%, 0%-5%, 5%-10% and 10%-100%, respectively. These findings further demonstrated that this TLS scoring system could represent the abundance of TLSs.

Supplementary figures

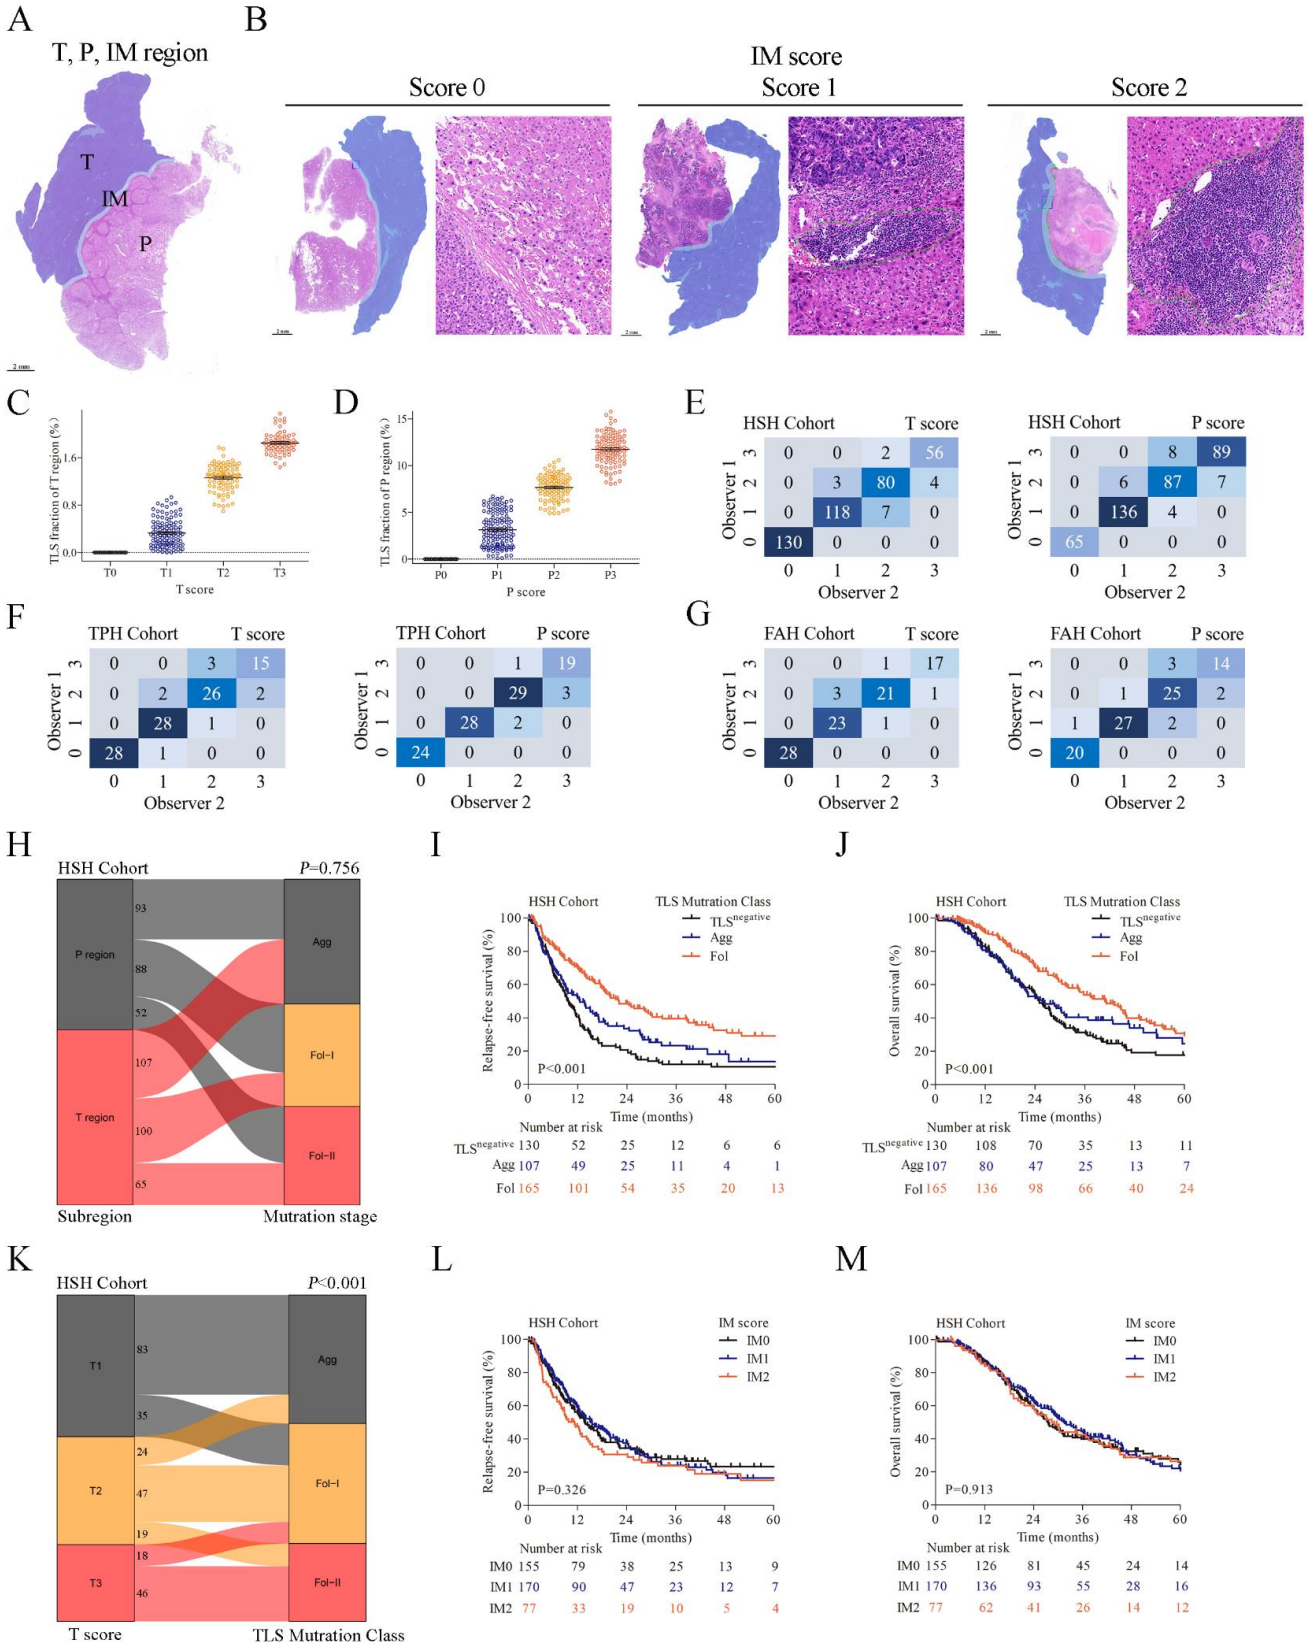

**Supplementary Fig. 1.** Additional information of the TLS scoring system. (A) Representatively schematic diagram of intra-tumor (T), peri-tumor (P) and invasive margin (IM) in whole side image (WSI). Peri-tumor region was highlighted in deep blue and invasive margin was highlighted in light blue. (B) Representative WSIs of H&E staining for TLS scoring system (IM score). (C, D) The distribution of TLS fraction with different T score (C) and P score (D) in the HSH Cohort. TLS fraction: area of TLSs/area of the scoring subregion. (E-G) Detailed T score, P score and IM score in the HSH Cohort (E), TPH Cohort (F) and FAH Cohort (G), respectively. (H) Correlation between T region, P region and maturation stages of TLSs in the HSH Cohort. (I, J) Kaplan-Meier curves showing relapse-free survival (I) and overall survival (J) of CRCLM patients stratified by TLSs Maturation Class in the HSH Cohort. (K) Correlation between T score and TLSs Maturation Class in the HSH Cohort. (L, M) Kaplan-Meier curves showing relapse-free survival (L) and overall survival (M) of CRCLM patients stratified by IM score in the HSH Cohort.

A

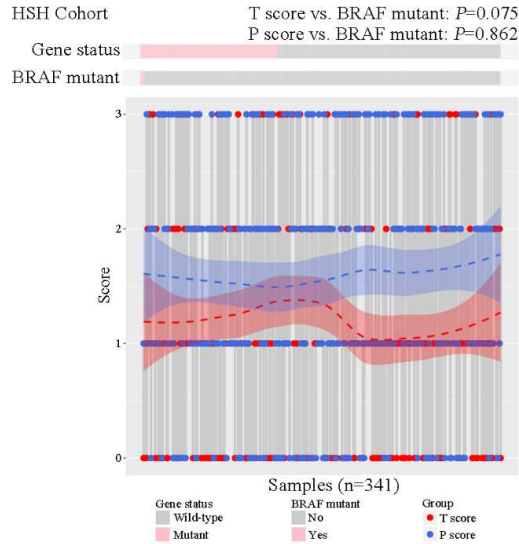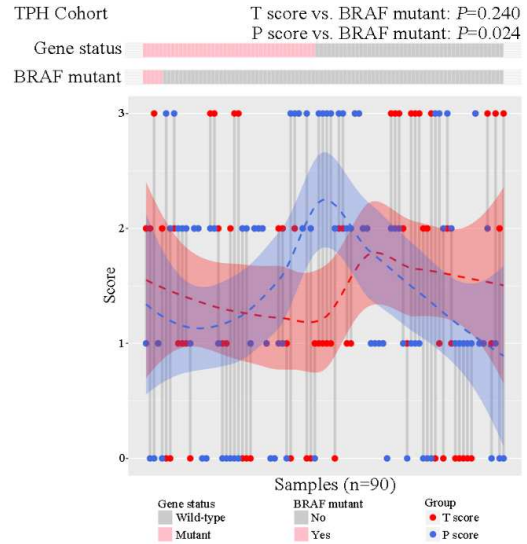

B

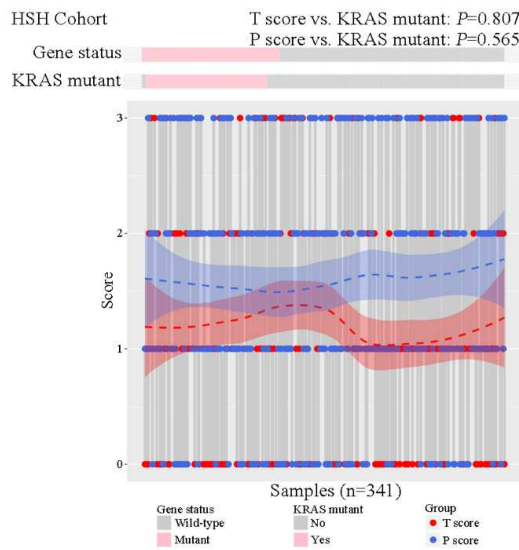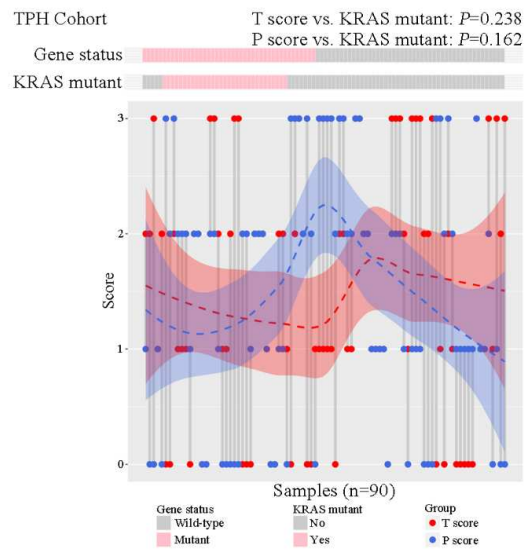

C

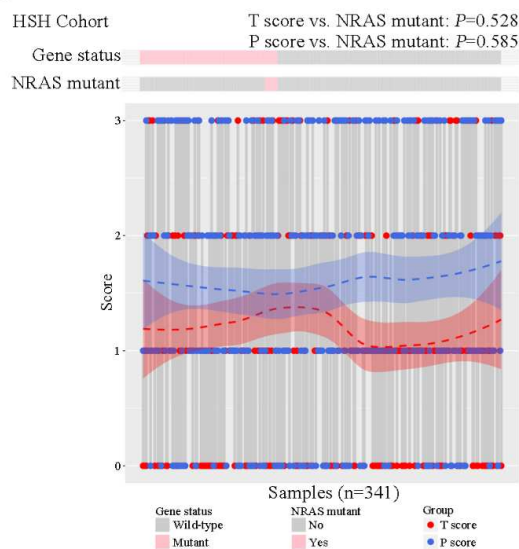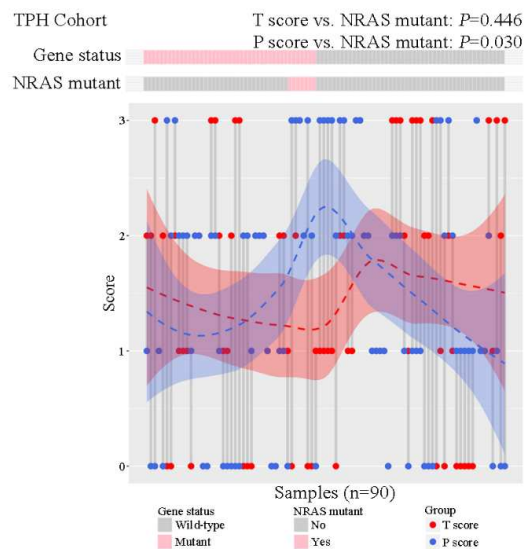

**Supplementary Fig. 2.** Correlation between gene mutation and T score and P score. (A) Relevance of T score and P score to BRAF mutation in the HSH and TPH Cohorts. (B) Relevance of T score and P score to KRAS mutation in the HSH and TPH Cohorts. (C) Relevance of T score and P score to NRAS mutation in the HSH and TPH Cohorts. The pick represents a mutation of gene, while the gray represents a wild-type of gene at the top. The connected red and blue circles on each column represent a patient's T score and P score, respectively. The red and blue curves represent the overall distribution of T score and P score of patients, respectively.

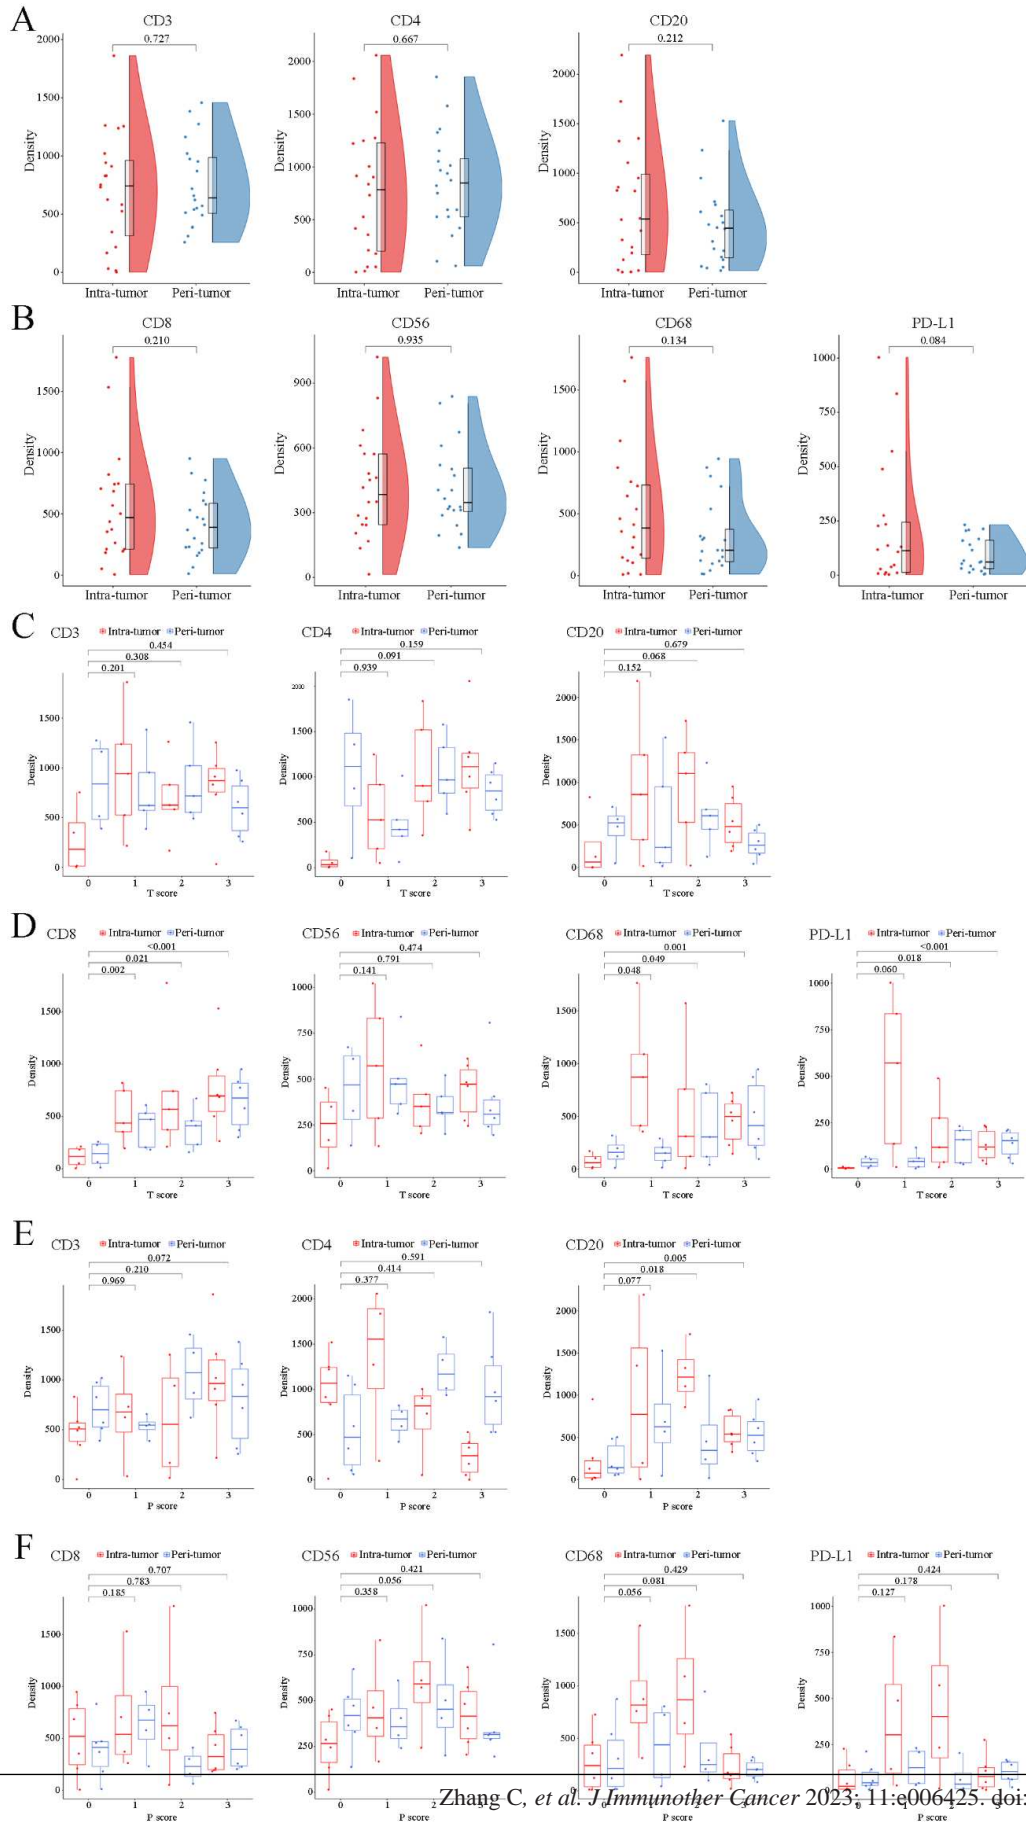



**Supplementary Fig. 3.** The immune composition of TLSs of CRCLM patients in the HSH Cohort. (A, B) Quantification of the density of CD3, CD4, CD20, CD8, CD56, CD56, CD68 and PD-L1 in intra-tumor and peri-tumor TLSs. (C-F) Quantification of the density of CD3, CD4, CD20, CD8, CD56, CD56, CD68 and PD-L1 in intra-tumor and peri-tumor TLSs with different T score (C, D) and P score (E, F), respectively.

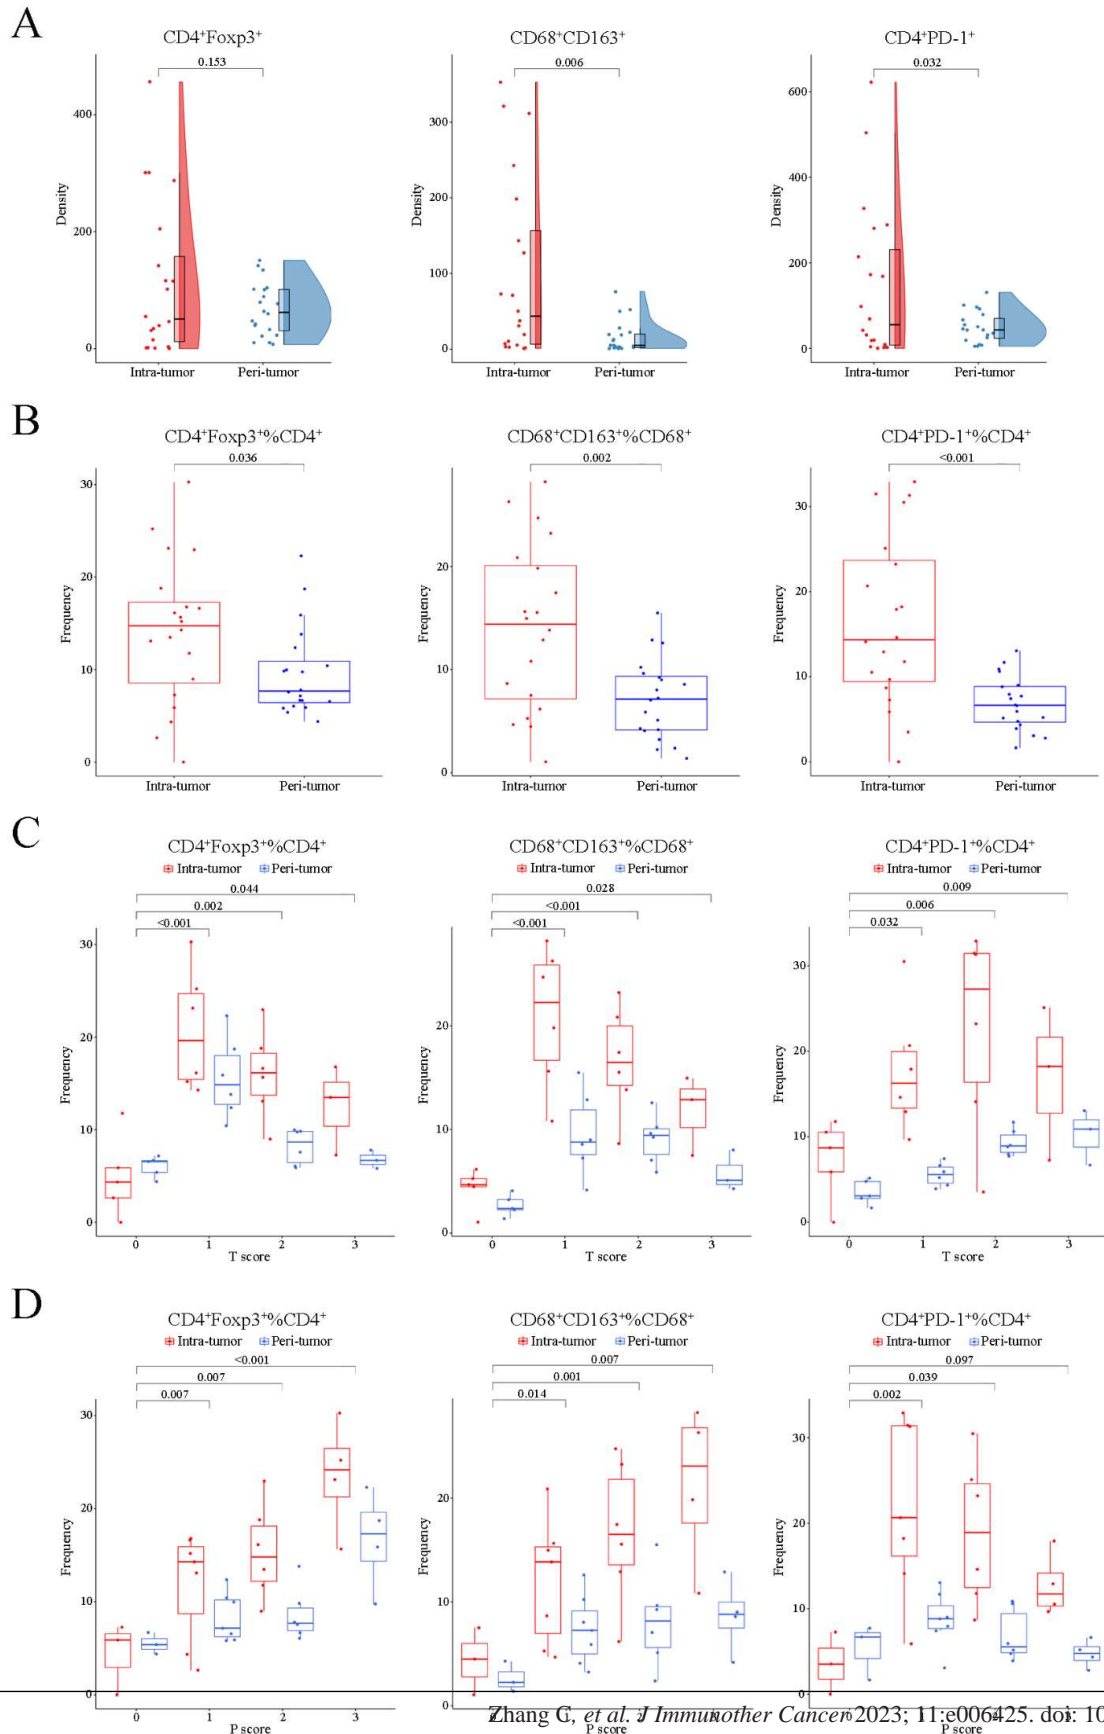

**Supplementary Fig. 4.** The immune composition of TLSs of CRCLM patients in the TPH Cohort. (A, B) Quantification of the density (A) and frequency (B) of CD4<sup>+</sup>Foxp3<sup>+</sup> Treg cells, CD4<sup>+</sup>PD-1<sup>+</sup> Tfh cells and CD68<sup>+</sup>CD163<sup>+</sup> M2 macrophages in intra-tumor and peri-tumor TLSs. (C, D) Quantification of the frequency of CD4<sup>+</sup>PD-1<sup>+</sup> Tfh cells and CD4<sup>+</sup>Foxp3<sup>+</sup> Treg cells within CD4<sup>+</sup> T cells and CD68<sup>+</sup>CD163<sup>+</sup> M2 macrophages within CD68<sup>+</sup> macrophages in intra-tumor and peri-tumor TLSs with different T score (C) and P score (D).

**Supplementary tables**

Supplementary Table 1. Information of the antibodies used in our research.

| Antibodies | Source | Catalogue |
|------------|--------|-----------|
| CD3        | Bioss  | bs-10498R |
| CD4        | Abcam  | ab133616  |
| CD20       | Dako   | IR604     |
| Foxp3      | Abcam  | ab20034   |
| PD-1       | CST    | 86163S    |
| CD8        | Abcam  | ab178089  |
| CD56       | Abcam  | ab75813   |
| CD68       | Abcam  | ab213363  |
| CD163      | Abcam  | ab182422  |
| PD-L1      | CST    | 13684S    |

Supplementary Table 2. Univariate and multivariate analysis of relapse-free survival of CRCLM patients in HSH Cohort

| Variables                                               | Univariate analysis |         | Multivariate analysis |         |
|---------------------------------------------------------|---------------------|---------|-----------------------|---------|
|                                                         | HR (95% CI)         | P value | HR (95% CI)           | P value |
| Sex (male vs. female)                                   | 1.054 (0.822-1.352) | 0.678   |                       |         |
| Age, years (60< vs. ≥60)                                | 0.869 (0.687-1.099) | 0.242   |                       |         |
| Occurrence of metastases (metachronous vs. synchronous) | 1.187 (0.921-1.530) | 0.186   |                       |         |
| Primary tumor location (left vs. right)                 | 0.836 (0.642-1.090) | 0.185   |                       |         |
| CEA (ng/ml) (5< vs. ≥5)                                 | 1.562 (1.185-2.060) | 0.002   | 1.386 (1.030-1.864)   | 0.031   |
| CA19-9 (U/ml) (40< vs. ≥40)                             | 1.323 (1.041-1.682) | 0.022   | 1.020 (0.783-1.331)   | 0.881   |
| CA125 (U/ml) (35< vs. ≥35)                              | 1.162 (0.902-1.498) | 0.245   |                       |         |
| Size, cm (5< vs. ≥5)                                    | 1.325 (1.008-1.742) | 0.043   | 1.048 (0.746-1.473)   | 0.785   |
| Tumor number (single vs. multiple)                      | 1.675 (1.315-2.132) | <0.001  | 1.392 (1.053-1.902)   | 0.029   |
| Liver fibrosis (yes vs. no)                             | 1.058 (0.707-1.584) | 0.784   |                       |         |
| Tumor grade (G1-2 vs. G3)                               | 1.236 (0.948-1.613) | 0.118   |                       |         |
| T stage (Tis-2 vs. T3-4)                                | 1.350 (1.029-1.770) | 0.030   | 0.861 (0.611-1.213)   | 0.392   |
| Lymph node metastasis (yes vs. no)                      | 1.345 (1.121-1.670) | 0.035   | 1.172 (1.011-1.383)   | 0.042   |
| Differentiation                                         |                     | 0.621   |                       |         |
| Poor                                                    | reference           |         |                       |         |
| Moderate                                                | 1.124 (0.806-1.569) | 0.491   |                       |         |
| Well                                                    | 1.072 (0.734-1.486) | 0.841   |                       |         |
| Gene status (wild-type vs. mutant)                      | 1.123 (0.865-1.458) | 0.383   |                       |         |
| Neoadjuvant chemotherapy (yes vs. no)                   | 1.372 (1.080-1.742) | 0.010   | 1.254 (1.022-1.637)   | 0.035   |
| TLS Maturation Class                                    |                     | <0.001  |                       |         |
| TLS <sup>negative</sup>                                 | reference           |         |                       |         |
| Agg                                                     | 1.805 (1.157-2.818) | 0.009   |                       |         |
| Fol-I                                                   | 2.396 (1.550-3.705) | <0.001  |                       |         |
| Fol-II                                                  | 3.181 (2.098-4.822) | <0.001  |                       |         |
| T score                                                 |                     | <0.001  |                       | <0.001  |
| 0                                                       | reference           |         | reference             |         |
| 1                                                       | 1.414 (1.089-2.046) | 0.014   | 1.424 (1.097-1.983)   | 0.025   |
| 2                                                       | 2.288 (1.485-3.502) | <0.001  | 1.718 (1.371-2.032)   | <0.001  |
| 3                                                       | 2.945 (1.944-4.461) | <0.001  | 2.204 (1.631-2.815)   | <0.001  |
| P score                                                 |                     | <0.001  |                       | <0.001  |
| 0                                                       | reference           |         | reference             |         |
| 1                                                       | 0.716 (0.403-0.904) | 0.017   | 0.647 (0.311-1.015)   | 0.058   |
| 2                                                       | 0.516 (0.386-0.689) | <0.001  | 0.323 (0.198-0.503)   | <0.001  |
| 3                                                       | 0.385 (0.212-0.408) | <0.001  | 0.211 (0.117-0.327)   | <0.001  |

Abbreviations: CRCLM, colorectal cancer liver metastases; HR, hazard ratio; CI, confidential interval; CEA, carcinoembryonic antigen.

Supplementary Table 3. Univariate and multivariate analysis of overall survival of CRCLM patients in HSH Cohort

| Variables                                               | Univariate analysis |         | Multivariate analysis |         |
|---------------------------------------------------------|---------------------|---------|-----------------------|---------|
|                                                         | HR (95% CI)         | P value | HR (95% CI)           | P value |
| Sex (male vs. female)                                   | 1.135 (0.877-1.469) | 0.335   |                       |         |
| Age, years (60< vs. ≥60)                                | 0.901 (0.707-1.149) | 0.401   |                       |         |
| Occurrence of metastases (metachronous vs. synchronous) | 1.073 (0.827-1.392) | 0.598   |                       |         |
| Primary tumor location (left vs. right)                 | 1.054 (0.796-1.396) | 0.712   |                       |         |
| CEA (ng/ml) (5< vs. ≥5)                                 | 1.372 (1.032-1.825) | 0.030   | 1.310 (1.002-1.714)   | 0.041   |
| CA19-9 (U/ml) (40< vs. ≥40)                             | 1.211 (0.946-1.551) | 0.128   |                       |         |
| CA125 (U/ml) (35< vs. ≥35)                              | 0.992 (0.764-1.288) | 0.952   |                       |         |
| Size, cm (5< vs. ≥5)                                    | 1.166 (0.881-1.543) | 0.283   |                       |         |
| Tumor number (single vs. multiple)                      | 1.743 (1.357-2.239) | <0.001  | 1.323 (1.013-1.729)   | 0.040   |
| Liver fibrosis (yes vs. no)                             | 1.390 (0.939-2.059) | 0.100   |                       |         |
| Tumor grade (G1-2 vs. G3)                               | 1.500 (1.144-1.967) | 0.003   | 1.171 (0.874-1.569)   | 0.290   |
| T stage (Tis-2 vs. T3-4)                                | 1.386 (1.050-1.829) | 0.021   | 0.956 (0.702-1.302)   | 0.775   |
| Lymph node metastasis (yes vs. no)                      | 1.465 (1.099-1.953) | 0.009   | 1.326 (1.056-1.787)   | 0.049   |
| Differentiation                                         |                     | 0.114   |                       |         |
| Poor                                                    | reference           |         |                       |         |
| Moderate                                                | 1.385 (0.979-1.960) | 0.065   |                       |         |
| Well                                                    | 1.040 (0.775-1.397) | 0.793   |                       |         |
| Gene status (wild-type vs. mutant)                      | 1.117 (0.851-1.467) | 0.424   |                       |         |
| Neoadjuvant chemotherapy (yes vs. no)                   | 1.609 (1.253-2.065) | <0.001  | 1.572 (1.216-2.033)   | 0.001   |
| TLS Maturation Class                                    |                     | <0.001  |                       |         |
| TLS <sup>negative</sup>                                 | reference           |         |                       |         |
| Agg                                                     | 3.785 (2.341-6.122) | <0.001  |                       |         |
| Fol-I                                                   | 3.224 (1.943-5.351) | <0.001  |                       |         |
| Fol-II                                                  | 3.110 (1.892-5.112) | <0.001  |                       |         |
| T score                                                 |                     | <0.001  |                       | <0.001  |
| 0                                                       | reference           |         | reference             |         |
| 1                                                       | 1.692 (1.231-2.775) | 0.037   | 1.318 (1.041-1.768)   | 0.046   |
| 2                                                       | 2.749 (1.730-4.369) | <0.001  | 2.024 (1.486-2.327)   | 0.011   |
| 3                                                       | 2.888 (1.836-4.542) | <0.001  | 2.233 (1.695-3.283)   | <0.001  |
| P score                                                 |                     | <0.001  |                       | <0.001  |
| 0                                                       | reference           |         | reference             |         |
| 1                                                       | 0.693 (0.511-0.941) | 0.019   | 0.701 (0.515-1.003)   | 0.038   |
| 2                                                       | 0.445 (0.330-0.599) | <0.001  | 0.473 (0.334-0.602)   | <0.001  |
| 3                                                       | 0.177 (0.102-0.309) | <0.001  | 0.209 (0.115-0.383)   | <0.001  |

Abbreviations: CRCLM, colorectal cancer liver metastases; HR, hazard ratio; CI, confidential interval; CEA, carcinoembryonic

---

antigen.





Supplementary Table 5. Correlation between the presence of TLS and the gene mutation of KRAS, NRAS and TP53 in GSE159216.

| Variables | KRAS      |           | P value | NRAS       |         | P value | TP53      |           | P value |
|-----------|-----------|-----------|---------|------------|---------|---------|-----------|-----------|---------|
|           | WT        | Mut       |         | WT         | Mut     |         | WT        | Mut       |         |
| TLS (%)   |           |           | 0.232   |            |         | 0.214   |           |           | 0.900   |
| TLS+      | 70 (40.9) | 58 (33.9) |         | 124 (72.5) | 4 (2.3) |         | 37 (21.7) | 91 (53.2) |         |
| TLS-      | 28 (16.4) | 15 (8.8)  |         | 39 (22.8)  | 4 (2.3) |         | 12 (7.0)  | 31 (18.1) |         |

Abbreviations: WT, wild-type; Mut, mutation.

Supplementary Table 6. Clinical characteristics and TLS scores of CRCLM patients in HSH and TPH Cohorts for multiplex immunohistochemistry.

| No.        | T score | P score | Occurrence of metastases | Primary tumor location | CEA, ng/ml | CA19-9, U/ml | CA125, U/ml | Size, cm | Tumor number | Liver fibrosis | Tumor grade | T stage | Lymph node metastasis | Differentiation | Gene status | Neoadjuvant chemotherapy | Immune Class |
|------------|---------|---------|--------------------------|------------------------|------------|--------------|-------------|----------|--------------|----------------|-------------|---------|-----------------------|-----------------|-------------|--------------------------|--------------|
| HSH Cohort |         |         |                          |                        |            |              |             |          |              |                |             |         |                       |                 |             |                          |              |
| 1          | 0       | 0       | Synchronous              | Left                   | 1.9        | 10.0         | 22.4        | 4.0      | Multiple     | No             | G2          | T4      | Yes                   | Moderate        | Wild-type   | Yes                      | Class III    |
| 2          | 0       | 3       | Metachronous             | Left                   | 50.0       | 34.4         | 32.1        | 3.5      | Multiple     | No             | G2          | T4      | Yes                   | Poor            | Mutant      | Yes                      | Class I      |
| 3          | 0       | 3       | Synchronous              | Left                   | 3.6        | 31.8         | 6.4         | 1.5      | Multiple     | No             | G2          | T2      | Yes                   | Moderate        | Wild-type   | Yes                      | Class I      |
| 4          | 0       | 3       | Synchronous              | Left                   | 20.3       | 1540.0       | 25.4        | 2.0      | Multiple     | No             | G2          | T2      | Yes                   | Poor            | Mutant      | No                       | Class I      |
| 5          | 1       | 0       | Metachronous             | Left                   | 7.2        | 37.5         | 18.0        | 2.5      | Single       | No             | G3          | T2      | No                    | Well            | Wild-type   | No                       | Class IV     |
| 6          | 1       | 1       | Synchronous              | Right                  | 1438.0     | 0.6          | 12.6        | 13.0     | Single       | No             | G3          | T2      | No                    | Moderate        | Wild-type   | No                       | Class III    |
| 7          | 1       | 2       | Synchronous              | Right                  | 11.4       | 76.0         | 58.9        | 2.0      | Single       | No             | G2          | T3      | Yes                   | Moderate        | Wild-type   | No                       | Class II     |
| 8          | 1       | 2       | Metachronous             | Left                   | 81.1       | 25.7         | 89.4        | 2.8      | Multiple     | Yes            | G2          | T2      | Yes                   | Poor            | Wild-type   | Yes                      | Class II     |
| 9          | 1       | 3       | Synchronous              | Left                   | 5.9        | 58.2         | 61.1        | 5.0      | Multiple     | No             | G3          | T2      | No                    | Well            | Wild-type   | Yes                      | Class I      |
| 10         | 2       | 0       | Metachronous             | Left                   | 4.4        | 8.1          | 11.6        | 5.0      | Multiple     | No             | G2          | T3      | Yes                   | Poor            | Wild-type   | Yes                      | Class IV     |
| 11         | 2       | 0       | Synchronous              | Left                   | 30.5       | 975.4        | 7.1         | 6.0      | Single       | No             | G3          | T2      | No                    | Moderate        | Wild-type   | No                       | Class IV     |
| 12         | 2       | 1       | Synchronous              | Left                   | 12.1       | 12.7         | 20.1        | 2.0      | Single       | No             | G3          | T2      | Yes                   | Poor            | Mutant      | Yes                      | Class III    |
| 13         | 2       | 2       | Synchronous              | Left                   | 57.8       | 0.6          | 8.8         | 3.8      | Multiple     | No             | G2          | T2      | Yes                   | Moderate        | Wild-type   | Yes                      | Class II     |
| 14         | 2       | 3       | Synchronous              | Right                  | 18.4       | 0.9          | 17.5        | 3.0      | Multiple     | No             | G1          | T3      | Yes                   | Moderate        | Mutant      | No                       | Class I      |
| 15         | 3       | 0       | Synchronous              | Right                  | 8.4        | 86.1         | 5.3         | 1.4      | Single       | No             | G2          | T2      | Yes                   | Well            | Mutant      | No                       | Class IV     |
| 16         | 3       | 0       | Metachronous             | Left                   | 4.9        | 11.2         | 11.2        | 3.0      | Single       | Yes            | G2          | T2      | No                    | Poor            | Wild-type   | No                       | Class IV     |
| 17         | 3       | 1       | Metachronous             | Left                   | 17.7       | 70.2         | 28.4        | 2.6      | Single       | No             | G2          | T2      | No                    | Moderate        | Wild-type   | Yes                      | Class IV     |
| 18         | 3       | 1       | Synchronous              | Left                   | 101.0      | 20.8         | 12.0        | 6.5      | Multiple     | No             | G3          | T4      | Yes                   | Moderate        | Wild-type   | No                       | Class IV     |
| 19         | 3       | 2       | Synchronous              | Left                   | 42.2       | 118.5        | 98.4        | 2.7      | Single       | No             | G2          | T2      | No                    | Moderate        | Wild-type   | No                       | Class III    |
| 20         | 3       | 3       | Synchronous              | Right                  | 0.9        | 435.0        | 46.6        | 3.0      | Multiple     | No             | G3          | T2      | Yes                   | Poor            | Wild-type   | Yes                      | Class II     |
| TPH Cohort |         |         |                          |                        |            |              |             |          |              |                |             |         |                       |                 |             |                          |              |
| 1          | 0       | 0       | Synchronous              | Left                   | 3.7        | 19.5         | 22.2        | 4.5      | Multiple     | No             | G2          | T2      | Yes                   | Moderate        | Mutant      | Yes                      | Class III    |
| 2          | 0       | 1       | Synchronous              | Left                   | 46.5       | 71.4         | 8.2         | 3.0      | Multiple     | Yes            | G2          | T3      | Yes                   | Moderate        | Wild-type   | Yes                      | Class II     |
| 3          | 0       | 2       | Metachronous             | Left                   | 81.2       | 182.7        | 69.6        | 8.0      | Multiple     | Yes            | G2          | T4      | Yes                   | Poor            | Mutant      | No                       | Class I      |
| 4          | 0       | 2       | Synchronous              | Left                   | 329.7      | 192.6        | 90.5        | 4.5      | Multiple     | Yes            | G2          | T3      | Yes                   | Moderate        | Wild-type   | Yes                      | Class I      |
| 5          | 0       | 3       | Metachronous             | Left                   | 2.5        | 50.1         | 37.3        | 5.0      | Multiple     | No             | G2          | T2      | Yes                   | Well            | Wild-type   | Yes                      | Class I      |
| 6          | 1       | 1       | Metachronous             | Right                  | 4.2        | 11.9         | 13.2        | 3.0      | Single       | No             | G2          | T3      | No                    | Moderate        | Wild-type   | No                       | Class III    |
| 7          | 1       | 1       | Metachronous             | Left                   | 21.6       | 61.0         | 12.8        | 2.5      | Multiple     | No             | G2          | T3      | Yes                   | Moderate        | Mutant      | No                       | Class III    |
| 8          | 1       | 2       | Synchronous              | Right                  | 2.7        | 8.0          | 11.4        | 3.5      | Single       | No             | G3          | T2      | Yes                   | Well            | Wild-type   | No                       | Class II     |
| 9          | 1       | 2       | Synchronous              | Left                   | 90.9       | 200.4        | 311.3       | 7.0      | Multiple     | No             | G3          | T4      | Yes                   | Moderate        | Mutant      | No                       | Class II     |
| 10         | 1       | 3       | Metachronous             | Right                  | 2.5        | 27.0         | 39.4        | 1.5      | Single       | No             | G2          | T2      | Yes                   | Well            | Wild-type   | Yes                      | Class I      |
| 11         | 1       | 3       | Synchronous              | Left                   | 1957.0     | 156.7        | 8.2         | 8.5      | Multiple     | No             | G3          | T4      | Yes                   | Moderate        | Wild-type   | Yes                      | Class I      |
| 12         | 2       | 0       | Metachronous             | Left                   | 4.9        | 38.4         | 40.1        | 2.5      | Single       | Yes            | G2          | T2      | No                    | Moderate        | Wild-type   | No                       | Class IV     |
| 13         | 2       | 1       | Metachronous             | Right                  | 53.5       | 32.4         | 9.1         | 6.0      | Single       | Yes            | G3          | T3      | No                    | Poor            | Mutant      | Yes                      | Class III    |
| 14         | 2       | 1       | Synchronous              | Right                  | 4.5        | 8.5          | 14.4        | 2.5      | Multiple     | No             | G2          | T2      | No                    | Moderate        | Wild-type   | Yes                      | Class III    |
| 15         | 2       | 2       | Metachronous             | Left                   | 1.52       | 30.0         | 40.3        | 3.0      | Multiple     | No             | G2          | T2      | No                    | Moderate        | Mutant      | No                       | Class II     |
| 16         | 2       | 2       | Synchronous              | Left                   | 328.5      | 784.0        | 618.3       | 7.5      | Multiple     | Yes            | G3          | T4      | Yes                   | Poor            | Wild-type   | No                       | Class II     |
| 17         | 2       | 3       | Metachronous             | Right                  | 142.8      | 67.6         | 40.1        | 6.5      | Single       | No             | G3          | T3      | Yes                   | Poor            | Wild-type   | No                       | Class I      |
| 18         | 3       | 0       | Metachronous             | Left                   | 6.3        | 31.2         | 9.5         | 4.0      | Single       | No             | G2          | T3      | Yes                   | Moderate        | Mutant      | No                       | Class IV     |
| 19         | 3       | 0       | Metachronous             | Left                   | 46.6       | 39.8         | 40.6        | 3.5      | Multiple     | No             | G2          | T3      | No                    | Moderate        | Wild-type   | Yes                      | Class IV     |
| 20         | 3       | 1       | Metachronous             | Left                   | 4.6        | 8.5          | 11.6        | 1.5      | Single       | No             | G2          | T2      | No                    | Well            | Wild-type   | Yes                      | Class IV     |

Abbreviations: CRCLM, colorectal cancer liver metastases; CEA, carcinoembryonic antigen.

Supplementary Table 7. Corresponding relationships among T score, P score, Immune score, and Immune Class.

| T score | P score | Immune score (RFS) | Immune score (OS) | Immune Class |
|---------|---------|--------------------|-------------------|--------------|
| 0       | 3       | -2.31              | -2.7              | Class I      |
| 1       | 3       | -1.79              | -2.03             |              |
| 0       | 2       | -1.54              | -1.8              |              |
| 2       | 3       | -1.27              | -1.36             |              |
| 1       | 2       | -1.02              | -1.13             | Class II     |
| 0       | 1       | -0.77              | -0.9              |              |
| 3       | 3       | -0.75              | -0.69             |              |
| 2       | 2       | -0.5               | -0.46             |              |
| 1       | 1       | -0.25              | -0.23             | Class III    |
| 0       | 0       | 0                  | 0                 |              |
| 3       | 2       | 0.02               | 0.21              |              |
| 2       | 1       | 0.27               | 0.44              |              |
| 1       | 0       | 0.52               | 0.67              | Class IV     |
| 3       | 1       | 0.79               | 1.11              |              |
| 2       | 0       | 1.04               | 1.34              |              |
| 3       | 0       | 1.56               | 2.01              |              |

Abbreviations: RFS, recurrence-free survival; OS, overall survival.

Immune score (RFS) =  $(0.52 \times \text{T score}) + (-0.77 \times \text{P score})$

Immune score (OS) =  $(0.67 \times \text{T score}) + (-0.90 \times \text{P score})$
